# Supplementary figures and images for: Suitability of the Compton-to-Rayleigh ratio in X-ray fluorescence spectroscopy: hydroxyapatite-based materials characterization
Source: Royal Society of Chemistry journal article supplement (doi:10.1039/c8ja00370j), 2019-01-01

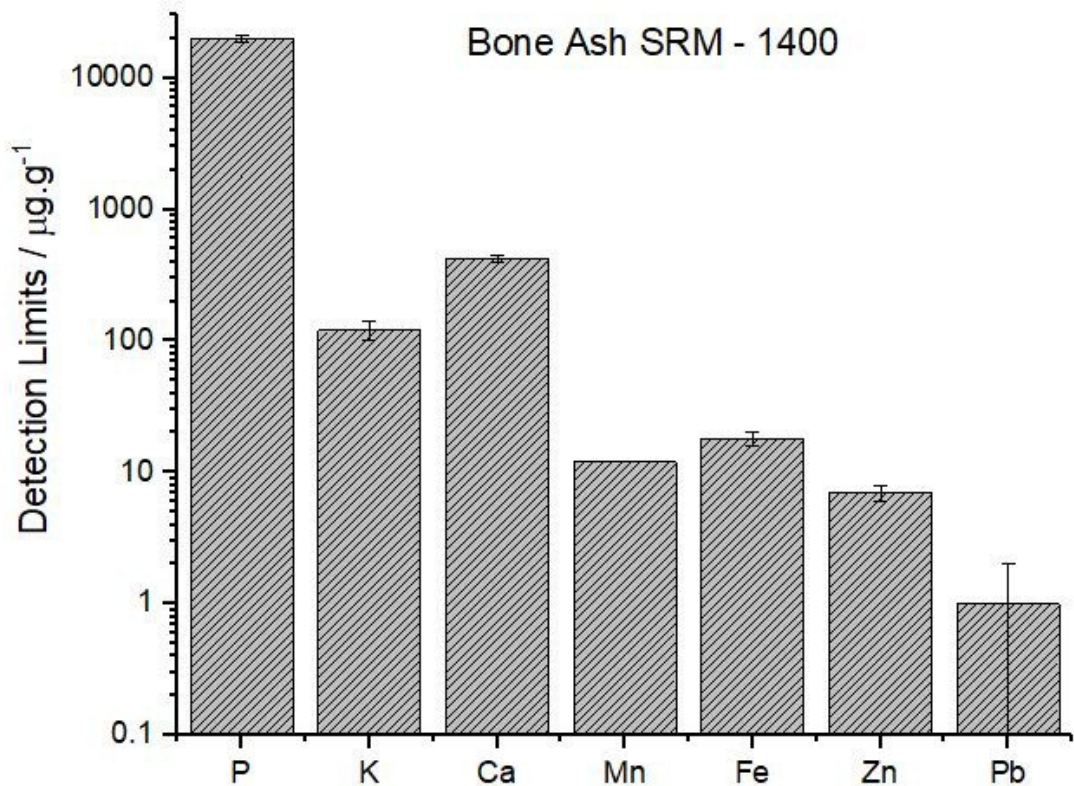

Supplement: c8ja00370j1.pdf [file c8ja00370j1.pdf]
